# Supplementary material for: Snake Venom Cathelicidins as Natural Antimicrobial Peptides
Source: PubMed Central journal article supplement (PMC6895205; doi:10.3389/fphar.2019.01415), 2019-11-29
Supplement: DataSheet_1.pdf [file DataSheet_1.pdf]

**Supplementary Table 1.** Reptilian cathelicidins (non-snake) deposited in the Antimicrobial Peptide Database (APD) with listed antibacterial and antibiofilm activities.

| ID and peptide name     | Organism                                  | Active peptide sequence                      | Bacterial strains              | Activity                                                |                  | Reference           |
|-------------------------|-------------------------------------------|----------------------------------------------|--------------------------------|---------------------------------------------------------|------------------|---------------------|
|                         |                                           |                                              |                                | Antibacterial and Antibiofilm ( $\mu\text{g.mL}^{-1}$ ) | Other activities |                     |
| AP03078<br>Cm-CATH1     | Green sea turtle<br><i>Chelonia mydas</i> | RRSIFRKLRRKIKKGLKKGIQ<br>HLLAGGRQGLPQGGRPGMI | <i>Acinetobacter baumannii</i> | >200*                                                   | Antifungal       | (Qiao et al., 2019) |
|                         |                                           |                                              | <i>Bacillus cereus</i>         | 75*                                                     |                  |                     |
|                         |                                           |                                              | <i>Bacillus subtilis</i>       | 18,75*                                                  |                  |                     |
|                         |                                           |                                              | <i>Enterococcus faecalis</i>   | >200*                                                   |                  |                     |
|                         |                                           |                                              | <i>Enterococcus faecium</i>    | 4,69*                                                   |                  |                     |
|                         |                                           |                                              | <i>Escherichia coli</i>        | 4,69 to >200*                                           |                  |                     |
|                         |                                           |                                              | <i>Klebsiella oxytoca</i>      | >200*                                                   |                  |                     |
|                         |                                           |                                              | <i>Klebsiella pneumoniae</i>   | 75 to >200*                                             |                  |                     |
|                         |                                           |                                              | <i>Nocardia asteroides</i>     | 4,69*                                                   |                  |                     |
|                         |                                           |                                              | <i>Proteus mirabilis</i>       | >200*                                                   |                  |                     |
| <i>Proteus vulgaris</i> | >200*                                     |                                              |                                |                                                         |                  |                     |

|  |  |  |                                     |                |  |  |
|--|--|--|-------------------------------------|----------------|--|--|
|  |  |  | <i>Pseudomonas aeruginosa</i>       | 4,69 to >200*  |  |  |
|  |  |  | <i>Serratia marcescens</i>          | >200*          |  |  |
|  |  |  | <i>Shigella dysenteriae</i>         | 4,69*          |  |  |
|  |  |  | <i>Staphylococcus aureus</i>        | 18,75 to >200* |  |  |
|  |  |  | <i>Staphylococcus epidermidis</i>   | >200*          |  |  |
|  |  |  | <i>Stenotrophomonas maltophilia</i> | 9,38*          |  |  |
|  |  |  | <i>Acinetobacter baumannii</i>      | 18,75*         |  |  |
|  |  |  | <i>Bacillus cereus</i>              | 9,38*          |  |  |
|  |  |  | <i>Bacillus subtilis</i>            | 4,69*          |  |  |
|  |  |  | <i>Enterococcus faecalis</i>        | 75*            |  |  |
|  |  |  | <i>Enterococcus faecium</i>         | 2,34*          |  |  |
|  |  |  |                                     | 10**           |  |  |
|  |  |  | <i>Escherichia coli</i>             | 25***          |  |  |
|  |  |  |                                     | 4,69 to 9,38*  |  |  |
|  |  |  |                                     | 25***          |  |  |

|                                     |        |                                           |                                |                |                                     |
|-------------------------------------|--------|-------------------------------------------|--------------------------------|----------------|-------------------------------------|
| AP03079<br><br>Cm-CATH2             |        | RRSRFGRFFKKVRKQLGRVL<br><br>RHSRITVGGRMRF | <i>Klebsiella oxytoca</i>      | 18,75*         | Antifungal<br><br>Anti-inflammatory |
|                                     |        |                                           | <i>Klebsiella pneumoniae</i>   | 9,38 to 18,75* |                                     |
|                                     |        |                                           | <i>Nocardia asteroides</i>     | 2,34*          |                                     |
|                                     |        |                                           | <i>Proteus mirabilis</i>       | 18,75*         |                                     |
|                                     |        |                                           | <i>Proteus vulgaris</i>        | 18,75*         |                                     |
|                                     |        |                                           | <i>Pseudomonas aeruginosa</i>  | 2,34 to 9,38*  |                                     |
|                                     |        |                                           | <i>Serratia marcescens</i>     | >200*          |                                     |
|                                     |        |                                           | <i>Shigella dysenteriae</i>    | 1,17*          |                                     |
|                                     |        |                                           | <i>Staphylococcus aureus</i>   | 4,69 to >200*  |                                     |
|                                     |        |                                           |                                | 10**<br>25***  |                                     |
| <i>Staphylococcus epidermidis</i>   | 9,38*  |                                           |                                |                |                                     |
| <i>Stenotrophomonas maltophilia</i> | 18,75* |                                           |                                |                |                                     |
| AP03080                             |        | TRGRWKRFWRGAGRFFRRH                       | <i>Acinetobacter baumannii</i> | >200*          | Antifungal                          |
|                                     |        | KEKIIRAAVDIVLS                            | <i>Bacillus cereus</i>         | 9,38*          |                                     |

|          |  |  |                                   |                |  |  |
|----------|--|--|-----------------------------------|----------------|--|--|
| Cm-CATH3 |  |  | <i>Bacillus subtilis</i>          | 1,17*          |  |  |
|          |  |  | <i>Enterococcus faecalis</i>      | 37,5*          |  |  |
|          |  |  | <i>Enterococcus faecium</i>       | 1,17*          |  |  |
|          |  |  | <i>Escherichia coli</i>           | 1,17 to 9,38*  |  |  |
|          |  |  | <i>Klebsiella oxytoca</i>         | >200*          |  |  |
|          |  |  | <i>Klebsiella pneumoniae</i>      | 9,38 to 18,75* |  |  |
|          |  |  | <i>Nocardia asteroides</i>        | 2,34*          |  |  |
|          |  |  | <i>Proteus mirabilis</i>          | >200*          |  |  |
|          |  |  | <i>Proteus vulgaris</i>           | >200*          |  |  |
|          |  |  | <i>Pseudomonas aeruginosa</i>     | 2,34 to 37,5*  |  |  |
|          |  |  | <i>Serratia marcescens</i>        | >200*          |  |  |
|          |  |  | <i>Shigella dysenteriae</i>       | 1,17*          |  |  |
|          |  |  | <i>Staphylococcus aureus</i>      | 1,17 to >200*  |  |  |
|          |  |  | <i>Staphylococcus epidermidis</i> | 37,5*          |  |  |
|          |  |  | <i>Stenotrophomonas</i>           | >200*          |  |  |

|                              |                |                                                             | <i>maltophilia</i>             |               |            |
|------------------------------|----------------|-------------------------------------------------------------|--------------------------------|---------------|------------|
| AP03081<br><br>Cm-CATH4      |                | MAFPFSTQRINPEIEEGNASLA<br>DLPVTHAGSLPGIKAQVRTAL<br>GIALLLVA | <i>Acinetobacter baumannii</i> | >200*         | Antifungal |
|                              |                |                                                             | <i>Bacillus cereus</i>         | >200*         |            |
|                              |                |                                                             | <i>Bacillus subtilis</i>       | 9,38*         |            |
|                              |                |                                                             | <i>Enterococcus faecalis</i>   | >200*         |            |
|                              |                |                                                             | <i>Enterococcus faecium</i>    | 4,69*         |            |
|                              |                |                                                             | <i>Escherichia coli</i>        | 9,38 to >200* |            |
|                              |                |                                                             | <i>Klebsiella oxytoca</i>      | >200*         |            |
|                              |                |                                                             | <i>Klebsiella pneumoniae</i>   | 37,5 to >200* |            |
|                              |                |                                                             | <i>Nocardia asteroides</i>     | 37,5*         |            |
|                              |                |                                                             | <i>Proteus mirabilis</i>       | >200*         |            |
|                              |                |                                                             | <i>Proteus vulgaris</i>        | >200*         |            |
|                              |                |                                                             | <i>Pseudomonas aeruginosa</i>  | >200*         |            |
|                              |                |                                                             | <i>Serratia marcescens</i>     | >200*         |            |
|                              |                |                                                             | <i>Shigella dysenteriae</i>    | 9,38*         |            |
| <i>Staphylococcus aureus</i> | 18,75 to >200* |                                                             |                                |               |            |

|          |                             |                     |                                     |                |            |                    |
|----------|-----------------------------|---------------------|-------------------------------------|----------------|------------|--------------------|
|          |                             |                     | <i>Staphylococcus epidermidis</i>   | >200*          |            |                    |
|          |                             |                     | <i>Stenotrophomonas maltophilia</i> | 75             |            |                    |
| AP03050  | Chinese soft-shelled turtle | TRGRWGRFKRRAGRFIRNR | <i>Acinetobacter baumannii</i>      | >200*          | Antifungal | (Shi et al., 2019) |
| Ps-CATH4 | <i>Pelodiscus</i>           | WQIISTGLKLIG        | <i>Bacillus cereus</i>              | 2,34*          |            |                    |
|          |                             |                     | <i>Bacillus subtilis</i>            | 9,38*          |            |                    |
|          |                             |                     | <i>Dysentery bacillus</i>           | 2,34           |            |                    |
|          |                             |                     | <i>Enterococcus faecalis</i>        | >200*          |            |                    |
|          |                             |                     | <i>Enterococcus faecium</i>         | 9,38*          |            |                    |
|          |                             |                     | <i>Escherichia coli</i>             | 9,38*          |            |                    |
|          |                             |                     | <i>Klebsiella oxytoca</i>           | 4,69*          |            |                    |
|          |                             |                     | <i>Klebsiella pneumoniae</i>        | 9,38 to 18,75* |            |                    |
|          |                             |                     | <i>Nocardia asteroides</i>          | 9,38*          |            |                    |
|          |                             |                     | <i>Proteus mirabilis</i>            | 9,38*          |            |                    |
|          |                             |                     | <i>Proteus vulgaris</i>             | >200*          |            |                    |

|  |                 |  |                                     |                |  |  |
|--|-----------------|--|-------------------------------------|----------------|--|--|
|  | <i>sinensis</i> |  | <i>Pseudomonas aeruginosa</i>       | 9,38 to 18,75* |  |  |
|  |                 |  | <i>Salmonella paratyphi</i>         | 9,38*          |  |  |
|  |                 |  | <i>Serratia marcescens</i>          | >200*          |  |  |
|  |                 |  | <i>Staphylococcus aureus</i>        | 9,38* to >200* |  |  |
|  |                 |  | <i>Staphylococcus epidermidis</i>   | 18,75*         |  |  |
|  |                 |  | <i>Stenotrophomonas maltophilia</i> | 9,38 to 75*    |  |  |
|  |                 |  | <i>Acinetobacter baumannii</i>      | >200*          |  |  |
|  |                 |  | <i>Bacillus cereus</i>              | >200*          |  |  |
|  |                 |  | <i>Bacillus subtilis</i>            | >200*          |  |  |
|  |                 |  | <i>Dysentery bacillus</i>           | >200*          |  |  |
|  |                 |  | <i>Enterococcus faecalis</i>        | >200*          |  |  |
|  |                 |  | <i>Enterococcus faecium</i>         | >200*          |  |  |
|  |                 |  | <i>Escherichia coli</i>             | 18,75 to >200* |  |  |
|  |                 |  | <i>Klebsiella oxytoca</i>           | 75*            |  |  |

|                         |                                              |                                     |               |            |  |
|-------------------------|----------------------------------------------|-------------------------------------|---------------|------------|--|
| AP03051<br><br>Ps-CATH6 | KKPSKKPKPQAMTFPKVTVE<br><br>YFPASFSTAALTVPED | <i>Klebsiella pneumoniae</i>        | 37,5 to >200* | Antifungal |  |
|                         |                                              | <i>Nocardia asteroides</i>          | >200*         |            |  |
|                         |                                              | <i>Proteus mirabilis</i>            | >200*         |            |  |
|                         |                                              | <i>Proteus vulgaris</i>             | >200*         |            |  |
|                         |                                              | <i>Pseudomonas aeruginosa</i>       | 37,5 to >200* |            |  |
|                         |                                              | <i>Salmonella paratyphi</i>         | >200*         |            |  |
|                         |                                              | <i>Serratia marcescens</i>          | >200*         |            |  |
|                         |                                              | <i>Staphylococcus aureus</i>        | >200*         |            |  |
|                         |                                              | <i>Staphylococcus epidermidis</i>   | >200*         |            |  |
|                         |                                              | <i>Stenotrophomonas maltophilia</i> | 75 to >200*   |            |  |
| NA<br><br>AM-           | GLFKKLRKIKKGFKKIFKRL                         | <i>Acinetobacter baumannii</i>      | 10 to 42*     | NR         |  |
|                         |                                              | <i>Enterococcus faecalis</i>        | >42*          |            |  |
|                         |                                              | <i>Escherichia coli</i>             | 21 to 140*    |            |  |
|                         |                                              | <i>Klebsiella pneumoniae</i>        | 5,2 to 28*    |            |  |



|               |                                                                |                                              |                                |             |    |                                |    |
|---------------|----------------------------------------------------------------|----------------------------------------------|--------------------------------|-------------|----|--------------------------------|----|
| CATH21        | American<br>alligator<br><i>Alligator<br/>mississippiensis</i> |                                              | <i>Pseudomonas aeruginosa</i>  | 10 to 42*   | NR | (Barksdale<br>et al.,<br>2017) |    |
|               |                                                                |                                              | <i>Staphylococcus aureus</i>   | 28          |    |                                |    |
| NA            |                                                                | KIKKGFKKIFKRLPPIGVGVS<br>I<br>PLAGKR         | <i>Acinetobacter baumannii</i> | 10 to 28*   |    |                                |    |
|               |                                                                |                                              | <i>Enterococcus faecalis</i>   | >140*       |    |                                |    |
|               |                                                                |                                              | <i>Escherichia coli</i>        | >140*       |    |                                |    |
| AM-<br>CATH28 |                                                                |                                              | <i>Klebsiella pneumoniae</i>   | 5,6 to 28*  |    |                                |    |
|               |                                                                |                                              | <i>Pseudomonas aeruginosa</i>  | 21 to >42*  |    |                                |    |
|               |                                                                |                                              | <i>Staphylococcus aureus</i>   | >42*        |    |                                |    |
| NA            |                                                                | GLFKKLRRKIKKGFKKIFKRL<br>PPIGVGVS<br>IPLAGKR | <i>Acinetobacter baumannii</i> | 5,2*        |    |                                | NR |
|               |                                                                |                                              | <i>Enterococcus faecalis</i>   | >42*        |    |                                |    |
|               |                                                                |                                              | <i>Escherichia coli</i>        | 140*        |    |                                |    |
| AM-<br>CATH36 |                                                                |                                              | <i>Klebsiella pneumoniae</i>   | 5,2 to 5,6* |    |                                |    |
|               | <i>Pseudomonas aeruginosa</i>                                  |                                              | 5,2*                           |             |    |                                |    |
|               | <i>Staphylococcus aureus</i>                                   |                                              | 21*                            |             |    |                                |    |
|               |                                                                | <i>Acinetobacter baumannii</i>               | 4,69*                          |             |    |                                |    |
|               |                                                                | <i>Bacillus cereus</i>                       | 9,38*                          |             |    |                                |    |

|                                   |                                                    |                                               |                               |                |            |                     |
|-----------------------------------|----------------------------------------------------|-----------------------------------------------|-------------------------------|----------------|------------|---------------------|
| AP02898<br><br>As-CATH4           | Chinese alligator<br><br><i>Alligator sinensis</i> | RRGLFKKLRRKIKKGFKKIFK<br><br>RLPPVGVGVSIPLAGR | <i>Bacillus subtilis</i>      | 2,35*          | Antifungal | (Chen et al., 2017) |
|                                   |                                                    |                                               | <i>Enterococcus faecalis</i>  | >200*          |            |                     |
|                                   |                                                    |                                               | <i>Enterococcus faecium</i>   | 9,38*          |            |                     |
|                                   |                                                    |                                               | <i>Escherichia coli</i>       | 9,38 to >200*  |            |                     |
|                                   |                                                    |                                               |                               | 18,75**        |            |                     |
|                                   |                                                    |                                               |                               | 40***          |            |                     |
|                                   |                                                    |                                               | <i>Klebsiella oxytoca</i>     | 9,38*          |            |                     |
|                                   |                                                    |                                               | <i>Klebsiella pneumoniae</i>  | 9,38 to 18,75* |            |                     |
|                                   |                                                    |                                               | <i>Nocardia asteroides</i>    | >200*          |            |                     |
|                                   |                                                    |                                               | <i>Proteus mirabilis</i>      | 9,38*          |            |                     |
|                                   |                                                    |                                               | <i>Proteus vulgaris</i>       | 9,38*          |            |                     |
|                                   |                                                    |                                               | <i>Pseudomonas aeruginosa</i> | 9,38 to 18,75* |            |                     |
|                                   |                                                    |                                               | <i>Salmonella paratyphi</i>   | 4,69*          |            |                     |
|                                   |                                                    |                                               | <i>Shigella dysenteriae</i>   | 9,38*          |            |                     |
| <i>Staphylococcus aureus</i>      | 9,38 to >200*                                      |                                               |                               |                |            |                     |
| <i>Staphylococcus epidermidis</i> | 9,38*                                              |                                               |                               |                |            |                     |

|                               |                |                      |                                     |                  |            |
|-------------------------------|----------------|----------------------|-------------------------------------|------------------|------------|
|                               |                |                      | <i>Stenotrophomonas maltophilia</i> | 18,75 to 37,5*   |            |
| AP02899<br><br>As-CATH5       | G              | TRRKFWKKVLNGALKIAPFL | <i>Acinetobacter baumannii</i>      | 18,75 to 200*    | Antifungal |
|                               |                |                      | <i>Bacillus cereus</i>              | 18,75*           |            |
|                               |                |                      | <i>Bacillus subtilis</i>            | 2,35*            |            |
|                               |                |                      | <i>Enterococcus faecalis</i>        | 9,38*            |            |
|                               |                |                      | <i>Enterococcus faecium</i>         | 18,75*           |            |
|                               |                |                      | <i>Escherichia coli</i>             | 9,38 to 18,75*   |            |
|                               |                |                      |                                     | 18,75**<br>40*** |            |
|                               |                |                      | <i>Klebsiella oxytoca</i>           | 938*             |            |
|                               |                |                      | <i>Klebsiella pneumoniae</i>        | 9,38 to >200*    |            |
|                               |                |                      | <i>Nocardia asteroides</i>          | 9,38*            |            |
|                               |                |                      | <i>Proteus mirabilis</i>            | 4,69*            |            |
|                               |                |                      | <i>Proteus vulgaris</i>             | >200*            |            |
| <i>Pseudomonas aeruginosa</i> | 9,38 to 18,75* |                      |                                     |                  |            |
| <i>Salmonella paratyphi</i>   | 9,38*          |                      |                                     |                  |            |

|         |  |                     |                                     |                                    |            |  |
|---------|--|---------------------|-------------------------------------|------------------------------------|------------|--|
|         |  |                     | <i>Shigella dysenteriae</i>         | 9,38*                              |            |  |
|         |  |                     | <i>Staphylococcus aureus</i>        | 9,38 to 37,5*                      |            |  |
|         |  |                     | <i>Staphylococcus epidermidis</i>   | 18,75*                             |            |  |
|         |  |                     | <i>Stenotrophomonas maltophilia</i> | 9,38*                              |            |  |
|         |  |                     | <i>Acinetobacter baumannii</i>      | >200*                              |            |  |
|         |  |                     | <i>Bacillus cereus</i>              | >200*                              |            |  |
|         |  |                     | <i>Bacillus subtilis</i>            | 9,38*                              |            |  |
|         |  |                     | <i>Enterococcus faecalis</i>        | >200*                              |            |  |
|         |  |                     | <i>Enterococcus faecium</i>         | >200*                              |            |  |
|         |  |                     | <i>Escherichia coli</i>             | 4,69 to 18,75*<br>18,75**<br>40*** |            |  |
|         |  |                     | <i>Klebsiella oxytoca</i>           | 9,38*                              |            |  |
|         |  |                     | <i>Klebsiella pneumoniae</i>        | 9,38*                              |            |  |
| AP02900 |  | TRWLWLLRGGLKAAGWGIR | <i>Nocardia asteroides</i>          | 18,75*                             | Antifungal |  |

|          |         |                                     |                |  |  |
|----------|---------|-------------------------------------|----------------|--|--|
| As-CATH6 | AHLNRNQ | <i>Proteus mirabilis</i>            | 9,38*          |  |  |
|          |         | <i>Proteus vulgaris</i>             | >200*          |  |  |
|          |         | <i>Pseudomonas aeruginosa</i>       | 18,75 to 37,5* |  |  |
|          |         | <i>Salmonella paratyphi</i>         | 37,5*          |  |  |
|          |         | <i>Shigella dysenteriae</i>         | 37,5*          |  |  |
|          |         | <i>Staphylococcus aureus</i>        | 9,38 to >200*  |  |  |
|          |         | <i>Staphylococcus epidermidis</i>   | >200*          |  |  |
|          |         | <i>Stenotrophomonas maltophilia</i> | 18,75 to >200* |  |  |

Abbreviations: \*MIC (minimal inhibitory concentration); \*\*Inhibition of biofilm formation; \*\*\*Eradication of preformed biofilms; NA= Not available; NR= Not rated
